# Supplementary material
Source: ML conference proceedings conference paper supplement (https://openreview.net/forum?id=Twqa0GFMGX)
Supplement: supplementary_material [file attachment]

BFI-2 (60 item)

It will be an adaptation form of this 60 items survey where participants are only going to be asked for in total 10 items for each assessment. Here in these 60 items, there are three questions assessing each of the two facets of the Big Five domains. In our adaptation, there will be only one questions chosen from three questions assessing facets so that the total number of questions for each survey of personality states will reduce from 60 to 10. The rest of two items for each facet will be used at different assessment point in a random sequence.

Please write a number next to each statement to indicate the extent to which you agree or disagree with that statement.

| Disagree  strongly | Disagree  a little | Neither agree nor disagree | Agree  a little | Agree  strongly |
| --- | --- | --- | --- | --- |
| 1 | 2 | 3 | 4 | 5 |

Here are a number of characteristics that may or may not apply to you. For example, do you agree that you are someone who likes to spend time with others?

**I see myself as someone who:**

| 1 | Is outgoing, sociable. |
| --- | --- |
| 2 | Is talkative. |
| 3 | Tends to be quiet. |
| 4 | Is sometimes shy, introverted. |
| 5 | Has an assertive personality. |
| 6 | Is dominant, acts as a leader. |
| 7 | Finds it hard to influence people. |
| 8 | Prefers to have others take charge. |
| 9 | Is full of energy. |
| 10 | Shows a lot of enthusiasm. |
| 11 | Rarely feels excited or eager. |
| 12 | Is less active than other people. |
| 13 | Is compassionate, has a soft heart. |
| 14 | Is helpful and unselfish with others. |
| 15 | Feels little sympathy for others |
| 16 | Can be cold and uncaring. |
| 17 | Is respectful, treats others with respect. |
| 18 | Is polite, courteous to others. |
| 19 | Starts arguments with others. |
| 20 | Is sometimes rude to others. |
| 21 | Has a forgiving nature. |
| 22 | Assumes the best about people. |
| 23 | Tends to find fault with others. |
| 24 | Is suspicious of others’ intentions. |
| 25 | Is systematic, likes to keep things in order. |
| 26 | Keeps things neat and tidy. |
| 27 | Tends to be disorganized. |
| 28 | Leaves a mess, doesn’t clean up. |
| 29 | Is efficient, gets things done. |
| 30 | Is persistent, works until the task is finished. |
| 31 | Tends to be lazy. |
| 32 | Has difficulty getting started on tasks. |
| 33 | Is dependable, steady. |
| 34 | Is reliable, can always be counted on. |
| 35 | Can be somewhat careless. |
| 36 | Sometimes behaves irresponsibly. |
| 37 | Can be tense. |
| 38 | Worries a lot. |
| 39 | Is relaxed, handles stress well. |
| 40 | Rarely feels anxious or afraid. |
| 41 | Often feels sad. |
| 42 | Tends to feel depressed, blue. |
| 43 | Stays optimistic after experiencing a setback. |
| 44 | Feels secure, comfortable with self. |
| 45 | Is moody, has up and down mood swings. |
| 46 | Is temperamental, gets emotional easily. |
| 47 | Is emotionally stable, not easily upset. |
| 48 | Keeps their emotions under control. |
| 49 | Is curious about many different things. |
| 50 | Is complex, a deep thinker. |
| 51 | Avoids intellectual, philosophical discussions. |
| 52 | Has little interest in abstract ideas. |
| 53 | Is fascinated by art, music, or literature. |
| 54 | Values art and beauty. |
| 55 | Has few artistic interests. |
| 56 | Thinks poetry and plays are boring. |
| 57 | Is inventive, finds clever ways to do things. |
| 58 | Is original, comes up with new ideas. |
| 59 | Has little creativity. |
| 60 | Has difficulty imagining things. |

DIAMONDS S-8

Please write a number next to each statement to indicate the extent to which you agree or disagree with that statement.

| Disagree  strongly | Disagree  a little | Neither agree nor disagree | Agree  a little | Agree  strongly |
| --- | --- | --- | --- | --- |
| 1 | 2 | 3 | 4 | 5 |

| 1 | Work has to be done. |
| --- | --- |
| 2 | Deep thinking is required. |
| 3 | Somebody is being threatened, accused, or criticized. |
| 4 | Potential romantic partners are present. |
| 5 | The situation is pleasant. |
| 6 | The situation contains negative feelings (e.g., stress, anxiety, guilt, etc.). |
| 7 | Somebody is being deceived. |
| 8 | Social interactions are possible or required. |

Emotions

Please write a number next to each statement to indicate the extent to which you agree or disagree with that statement.

| Disagree  strongly | Disagree  a little | Neither agree nor disagree | Agree  a little | Agree  strongly |
| --- | --- | --- | --- | --- |
| 1 | 2 | 3 | 4 | 5 |

| 1 | Angry |
| --- | --- |
| 2 | Sad |
| 3 | Afraid |
| 4 | Surprised |
| 5 | Happy |
| 6 | Anxious |
| 7 | Excited |
| 8 | Lonely |

Situations

Below is a list of situations. Please check any that you encountered in the last hour.

(Checkbox style item that will be coded 1 if checked and 0 if blank)

| 1 | Was studying or doing school work. |
| --- | --- |
| 2 | Had an argument / disagreement with friend |
| 3 | Had an argument / disagreement with family |
| 4 | Interacted with a friend |
| 5 | Interacted with family |
| 6 | Lost something |
| 7 | Was late for something |
| 8 | Forgot something |
| 9 | Was bored with school work |
| 10 | Was excited about school work |
| 11 | Was anxious about school work |
| 12 | Felt tired |
| 13 | Felt sick |
| 14 | Did poorly on an assignment or exam |
| 15 | Was sleeping |
| 16 | Was in class |
| 17 | Was listening to music |
| 18 | Was on the Internet |
| 19 | Was watching TV |
| 20 | Procrastinated |
