# Supplementary material
Source: ML conference proceedings conference paper supplement (https://openreview.net/forum?id=Twqa0GFMGX)
Supplement: supplementary_material [file ESM_Codebook.xlsx]

## Sheet: Sheet3
Original_Item_Name	Current_Variable_Name	Reverse_Code(1 = reverse code, 0 = regular code)	Item Text
Sociab.1	E1 _1	0	In the last hour, you: - Behaved outgoing and sociable.
Sociab.4	E1 _2	0	In the last hour, you: - Were talkative.
Sociab.3	E1 _3	1	In the last hour, you: - Were shy.
Assert.1	E2_1	0	Click to write the question text - Behaved assertively.
Assert.2	E2_2	0	Click to write the question text - Behaved dominantly.
Assert.3	E2_3	1	Click to write the question text - Waited to have others take charge.
Energy.3	E3_1	0	In the last hour, you: - Were full of energy.
Energy.1	E3_2	0	In the last hour, you: - Felt excited or eager.
Energy.2	E3_3	1	In the last hour, you: - Were less active/engaged than other people.
Compass.1	A1 _1	0	In the last hour, you: - Were compassionate and soft hearted.
Compass.2	A1 _2	1	In the last hour, you: - Felt little sympathy for others.
Compass.4	A1 _3	1	In the last hour, you: - Were cold and uncaring to others.
Respect.1	A2 _1	0	In the last hour, you: - Treated others with respect.
Respect.4	A2 _2	0	In the last hour, you: - Behaved courteous to others.
Respect.3	A2 _3	1	In the last hour, you: - Were rude to others.
Trust.2	A3_1	0	In the last hour, you: - Were forgiving to others.
Trust.1	A3_2	1	In the last hour, you: - Found fault with others.
Trust.3	A3_3	1	In the last hour, you: - Were suspicious of others' intentions.
Organiz.2	C1_1	0	In the last hour, you: - Kept things neat and tidy.
Organiz.1	C1_2	1	In the last hour, you: - Were quite disorganized.
Organiz.3	C1_3	1	In the last hour, you: - Were messy.
Product.2	C2_1	0	In the last hour, you: - Were efficient, got things done.
Product.3	C2_2	0	In the last hour, you: - Worked persistently.
Product.1	C2_3	1	In the last hour, you: - Were lazy.
Respons.3	C3_1	0	In the last hour, you: - Were reliable and could be counted on.
Respons.2	C3_2	1	In the last hour, you: - Were somewhat careless.
Respons.4	C3_3	1	In the last hour, you: - Behaved irresponsibly.
Anxiety.3	N1_1	0	In the last hour, you: - Worried.
Anxiety.4	N1_2	1	In the last hour, you: - Didn't feel anxious or sad.
Anxiety.1	N1_3	1	In the last hour, you: - Were relaxed.
Depres.4	N2_1	0	In the last hour, you: - Felt depressed, blue.
Depres.2	N2_2	1	In the last hour, you: - Felt secure, comfortable with self.
Depres.3	N2_3	0	In the last hour, you: - Felt sad.
Violat.2	N3_1	1	In the last hour, you: - Were emotionally stable, were not easily upset.
Violat.3	N3_2	1	In the last hour, you: - Kept emotions under control.
Violat.1	N3_3	0	In the last hour, you: - Emotions swung up and down.
Curious.3	O1_1	0	In the last hour, you: - Thought complex and deep thoughts.
Curious.4	O1_2	1	In the last hour, you: - Had little interest in abstract ideas.
Curious.1	O1_3	0	In the last hour, you: - Were curious.
Aesth.3	O2_1	0	In the last hour, you: - Valued art and beauty.
Aesth.1	O2_2	0	In the last hour, you: - Experienced interest in arts.
Aesth.2	O2_3	0	In the last hour, you: - Were fascinated by art, music, or literature.
Creativ.2	O3_1	1	In the last hour, you: - Were not creative.
Creativ.3	O3_2	0	In the last hour, you: - Sought out any new experiences.
Creativ.1	O3_3	0	In the last hour, you: - Found clever ways to do things.
Duty	DIAMONDS_1	0	Consider the situation and surroundings at the time of taking the survey. Please indicate the extent to which you agree or disagree with the following statements. - Work has to be done.
Intelligent	DIAMONDS_2	0	Consider the situation and surroundings at the time of taking the survey. Please indicate the extent to which you agree or disagree with the following statements. - Deep thinking is required.
Adversity	DIAMONDS_3	0	Consider the situation and surroundings at the time of taking the survey. Please indicate the extent to which you agree or disagree with the following statements. - Somebody is being threatened, accused, or criticized.
Mating	DIAMONDS_4	0	Consider the situation and surroundings at the time of taking the survey. Please indicate the extent to which you agree or disagree with the following statements. - Romantic partners are present (physically or digitally).
Positivity	DIAMONDS_5	0	Consider the situation and surroundings at the time of taking the survey. Please indicate the extent to which you agree or disagree with the following statements. - The situation is pleasant.
Negativity	DIAMONDS_6	0	Consider the situation and surroundings at the time of taking the survey. Please indicate the extent to which you agree or disagree with the following statements. - The situation contains negative feelings (e.g., stress, anxiety, guilt, etc.)
Deception	DIAMONDS_7	0	Consider the situation and surroundings at the time of taking the survey. Please indicate the extent to which you agree or disagree with the following statements. - Somebody is being deceived.
Social	DIAMONDS_8	0	Consider the situation and surroundings at the time of taking the survey. Please indicate the extent to which you agree or disagree with the following statements. - Social interactions are possible or required.
Anger	Emotion_1	0	Please indicate the extent to which you are experiencing the following emotions at the time of the survey. - Anger
Sad	Emotion_2	0	Please indicate the extent to which you are experiencing the following emotions at the time of the survey. - Sad
Afraid	Emotion_3	0	Please indicate the extent to which you are experiencing the following emotions at the time of the survey. - Afraid
Surprised	Emotion_4	0	Please indicate the extent to which you are experiencing the following emotions at the time of the survey. - Surprised
Happy	Emotion_5	0	Please indicate the extent to which you are experiencing the following emotions at the time of the survey. - Happy
Anxious	Emotion_6	0	Please indicate the extent to which you are experiencing the following emotions at the time of the survey. - Anxious
Excited	Emotion_7	0	Please indicate the extent to which you are experiencing the following emotions at the time of the survey. - Excited
Lonely	Emotion_8	0	Please indicate the extent to which you are experiencing the following emotions at the time of the survey. - Lonely
Study	Di_Sit_1	0	Below is a list of situations. Please indicate if any that you encountered in the last hour. - Were studying or doing school work.
Argument	Di_Sit_2	0	Below is a list of situations. Please indicate if any that you encountered in the last hour. - Had an argument / disagreement with someone.
Soc_Interact	Di_Sit_3	0	Below is a list of situations. Please indicate if any that you encountered in the last hour. - Interacted with other people.
Late	Di_Sit_4	0	Below is a list of situations. Please indicate if any that you encountered in the last hour. - Were late for something.
Forgot	Di_Sit_5	0	Below is a list of situations. Please indicate if any that you encountered in the last hour. - Forgot something.
Tired	Di_Sit_6	0	Below is a list of situations. Please indicate if any that you encountered in the last hour. - Felt tired.
Sick	Di_Sit_7	0	Below is a list of situations. Please indicate if any that you encountered in the last hour. - Felt sick.
Slept	Di_Sit_8	0	Below is a list of situations. Please indicate if any that you encountered in the last hour. - Slept.
Class	Di_Sit_9	0	Below is a list of situations. Please indicate if any that you encountered in the last hour. - Were in class.
Procrastinated	Di_Sit_10	0	Below is a list of situations. Please indicate if any that you encountered in the last hour. - Procrastinated.
