# Supplementary material
Source: ML conference proceedings conference paper supplement (https://openreview.net/forum?id=Twqa0GFMGX)
Supplement: supplementary_material [file Protocol.docx]

**1.12: Provide a description of the enrollment and consent process in sequential order and address EACH of the bulleted points below:**

Students will have access to recruitment information on the University Department of Psychology system where contact information (e.g., email) to the research team will be included. Students who interested in participating the study will be direct to contact the research team to set up an appointment for consent and initial assessment. Student will be consent at a private lab setting with electronic versions of consent forms delivered through laboratory desktop. Students can take time to review the consent material as much as they want to and they can choose to leave the lab at any point of time.

The consent letter will be delivered through a Qualtrics Survey on and laboratory desktop. Students will review the consent letter as part of the survey and will be asked to choose either "Accept" or "Not Accept" to participate in the study. The final questions will posit "If you agree to take part in the research, please “print a copy of this page to keep for future reference, then click on the “Accept” button below.”". Research team will provide a paper copy of the consent form to the participants at the end of the consent session.

We will minimize the possibility of coercion or undue influence by informing participants that their participation is voluntary and that they may withdraw or end their participation at any time.

**1.13. Provide a detailed description in sequential order of the study procedures following the consent process - DO NOT cut and paste from the Consent Document. Describe study populations separately if they will be participating in different procedures.**

Informed Consent and Initial Assessment:

Participants will reach out to research team through the contact information provided in the recruit posts. Participants will schedule an appointment with the research teach in weekdays to complete the consent session and potentially the initial lab assessments (week 0).

Participants will arrive to the Lab for their designated study time slot and will be escorted to a cubicle or single room and seated at a personal computer to complete the study individually. The experimenter will tell participants: 1) that the study is approximately 1 hour, 2) ask them to carefully read the consent form prior to participating, 3) to inform the experimenter if they experience any problems during the study, and 4) to come outside the room/cubicle when they are done. All remaining procedures will then be administered on the computer through a Qualtrics survey, and the experimenter will not have any further contact with participants until the end of the study session. Thus, all experimenters will be blind to participants’ condition assignment. The Qualtrics survey study session will begin with the informed consent process, in which participants will be informed that they will complete a study about aimed to understand individual's unique personality structure include a baseline assessment and three weeks ESM (Experience Sampling Method) study (see informed consent document). The initial assessment include students' demographic information, Big Five personality trait, Emotion, and Situation (see attached Baseline Assessment File).

ESM (Experience Sampling Method) Assessment:

Starting the Monday of the following week of initial assessment (week 1), participants will start ESM (Experience Sampling Method) assessment on their phone through a Qualtrics link delivered through SMS. Each survey is expected to take the participants 3 to 5 minutes to finish. The survey includes an adaptation form of BFI-2, an objective situation measurement, a psychological situation measurement (DIAMONDS), and an emotion measurement (see ESM survey document). It will be an adaptation form of this 60 items survey where participants are only going to be asked for in total 30 items for each assessment. The BFI-2 is a 60 items survey, there are three questions assessing each of the two facets of the Big Five domains. In our adaptation, there will be only two questions chosen from three questions assessing facets so that the total number of questions for each survey of personality states will reduce from 60 to 30. The rest of two items for each facet will be used at different assessment point in a random sequence. There will be 6 assessments send to participants phone every day by SMS with a gap time of two hours. The first assessment of take place at 9am each day and the last survey for the day will appear at 7pm. The process of ESM measures will take place from week 1 to week 3. Participants can contact the research group by email at any time for any technique issue and.

SMS are sending through a python script that runs locally in a laboratory desktop. The script read information from an excel sheet which contains information of participants’ ID (de-identifiable), their ESM starting date, ending date, and their phone number and an additional csv file which contains links to 42 versions of Qualtrics survey. The script calls Twilio’s API to send SMS to each participant only who is “active” (current time is within the range of their start and ending time) in the study each time it runs. The script is triggered by a crontab schedule sending SMS 6 times a day until the end of the data collection.

In week 4 participants will be asked to return to the lab to receive compensation. We will also provide the result of current study and participants' unique personality structures (if any) to the participants for better self knowledge. Participants will receive personalized feedback reports. These reports will include only basic descriptive (means, standard deviations, correlations between behaviors) to give them a summary of what their 3 weeks in the study looked like. Reports will be automatically generated via a script created by the PI and no member of the study team, including the PI, will view the reports. Participants names and other identifying information will not be linked to these documents. Participants will receive the file and the password to the file in separate emails.

At the end of the data collection session, the two excel sheet which contains PII information will be deleted permanently.
